# Supplementary material
Source: publisher figshare collection journal article supplement (https://sage.figshare.com/ndownloader/files/24074392)
Supplement: Supplementary file 1 [file 24074392]

Online Supplementary Table 1. Quality appraisal of extracted qualitative studies using the Critical Appraisal Skills Programme Checklist

| Items                                                                                   | Davis et al.<br>(2012) | Gowing et al.<br>(2016) | Hudon et al.<br>(2015) | Sandberg et al.<br>(2014) | Williams et al.<br>(2011) |
|-----------------------------------------------------------------------------------------|------------------------|-------------------------|------------------------|---------------------------|---------------------------|
| 1. Was there a clear statement of the aims of the research?                             | Y                      | Y                       | Y                      | Y                         | Y                         |
| 2. Is a qualitative methodology appropriate?                                            | Y                      | Y                       | Y                      | Y                         | Y                         |
| 3. Was the research design appropriate to address the aims of the research?             | Y                      | Y                       | Y                      | Y                         | Y                         |
| 4. Was the recruitment strategy appropriate to the aims of the research?                | Y                      | Y                       | Y                      | Y                         | Y                         |
| 5. Was the data collected in a way that addressed the research issue?                   | Y                      | Y                       | Y                      | Y                         | Y                         |
| 6. Has the relationship between researcher and participants been adequately considered? | N                      | N                       | N                      | N                         | N                         |
| 7. Have ethical issues been taken into consideration?                                   | Y                      | Y                       | Y                      | Y                         | Y                         |
| 8. Was the data analysis sufficiently rigorous?                                         | Y                      | Y                       | Y                      | Y                         | Y                         |
| 9. Is there a clear statement of findings?                                              | Y                      | Y                       | Y                      | Y                         | Y                         |
| 10. How valuable is the research?                                                       | Y                      | Y                       | Y                      | Y                         | Y                         |

*Note.* Y = yes; N = no.

Online Supplementary Table 2. Quality appraisal of extracted experimental studies using the Amsterdam–Maastricht Consensus List

[illegible]

| Items                                                                                      | Baldwin<br>et al.<br>(2014) | Bodenmann<br>et al. (2017) | Brokel<br>et al.<br>(2012) | Bui et<br>al.<br>(2019) | Chow<br>&<br>Wong<br>(2014) | Edgren<br>et al.<br>(2016) | Gabbay<br>et al.<br>(2013) | Ishani<br>et al.<br>(2011) | G. S.<br>Kim et<br>al.<br>(2014) | Lu et<br>al.<br>(2020) | Meisinger<br>et al.<br>(2013) | Reinius<br>et al.<br>(2013) | Silva<br>et al.<br>(2020) | Tao et<br>al.<br>(2015) |
|--------------------------------------------------------------------------------------------|-----------------------------|----------------------------|----------------------------|-------------------------|-----------------------------|----------------------------|----------------------------|----------------------------|----------------------------------|------------------------|-------------------------------|-----------------------------|---------------------------|-------------------------|
| 9. Were the groups similar at baseline regarding the most important prognostic indicators? | +                           | +                          | +                          | +                       | +                           | +                          | +                          | +                          | –                                | +                      | +                             | +                           | +                         | +                       |
| 10. Were co-interventions avoided or similar?                                              | +                           | +                          | +                          | +                       | +                           | +                          | +                          | +                          | +                                | +                      | +                             | +                           | +                         | +                       |
| 11. Was the compliance acceptable in all groups?                                           | +                           | +                          | +                          | +                       | +                           | +                          | +                          | +                          | +                                | +                      | +                             | +                           | +                         | +                       |
| 12. Was the timing of the outcome assessment similar in all groups?                        | +                           | +                          | +                          | +                       | +                           | +                          | +                          | +                          | +                                | +                      | +                             | +                           | +                         | +                       |
| <b>Total</b>                                                                               | <b>7</b>                    | <b>10</b>                  | <b>10</b>                  | <b>7</b>                | <b>10</b>                   | <b>10</b>                  | <b>10</b>                  | <b>10</b>                  | <b>5</b>                         | <b>7</b>               | <b>10</b>                     | <b>10</b>                   | <b>10</b>                 | <b>10</b>               |

*Note.* Range = 0–12 points; + = Yes (score 1); – = No (score 0), criterion was not met or not clearly stated.

Online Supplementary Table 3. Quality appraisal of extracted mixed method study using the Mixed-Methods Appraisal Tool, Version 2018

| Category of study designs                    |                                                                                                                         | Hudon et al. (2018) |
|----------------------------------------------|-------------------------------------------------------------------------------------------------------------------------|---------------------|
| Screening questions                          | S1. Are there clear research questions?                                                                                 | Y                   |
|                                              | S2. Do the collected data allow to address the research questions?                                                      | Y                   |
| 1. Qualitative                               | 1.1. Is the qualitative approach appropriate to answer the research question?                                           | Y                   |
|                                              | 1.2. Are the qualitative data collection methods adequate to address the research question?                             | Y                   |
|                                              | 1.3. Are the findings adequately derived from the data?                                                                 | Y                   |
|                                              | 1.4. Is the interpretation of results sufficiently substantiated by data?                                               | Y                   |
|                                              | 1.5. Is there coherence between qualitative data sources, collection, analysis and interpretation?                      | Y                   |
| 2. Quantitative randomized controlled trials | 2.1. Is randomization appropriately performed                                                                           | Y                   |
|                                              | 2.2. Are the groups comparable at baseline?                                                                             | Y                   |
|                                              | 2.3. Are there complete outcome data?                                                                                   | Y                   |
|                                              | 2.4. Are outcome assessors blinded to the intervention provided?                                                        | Y                   |
|                                              | 2.5. Did the participants adhere to the assigned intervention?                                                          | N                   |
| 3. Mixed method                              | 5.1. Is there an adequate rationale for using a mixed methods design to address the research question?                  | Y                   |
|                                              | 5.2. Are the different components of the study effectively integrated to answer the research question?                  | Y                   |
|                                              | 5.3. Are the outputs of the integration of qualitative and quantitative components adequately interpreted?              | Y                   |
|                                              | 5.4. Are divergences and inconsistencies between quantitative and qualitative results adequately addressed?             | Y                   |
|                                              | 5.5. Do the different components of the study adhere to the quality criteria of each tradition of the methods involved? | N                   |

*Note.* Y = yes; N = no or clearly not stated.
